# Supplementary material for: A photochromic naphthalene diimide coordination network sensitized by polyoxometalates
Source: Royal Society of Chemistry journal article supplement (doi:10.1039/c4dt02641a), 2014-10-02
Supplement: c4dt02641a1.pdf [file c4dt02641a1.pdf]

## Supporting information

# A Photochromic Naphthalene Diimide Coordination Networks Sensitized by Polyoxometalates

Jian-Jun Liu,<sup>a</sup> Yao Wang,<sup>a</sup> Yu-Jian Hong,<sup>a</sup> Mei-Jin Lin,<sup>\*ab</sup> Chang-Cang Huang<sup>\*a</sup> and Wen-Xin Dai<sup>a</sup>

<sup>a</sup> State Key Laboratory of Photocatalysis on Energy and Environment, College of Chemistry, Fuzhou University, China, 350116; and <sup>b</sup> State Key Laboratory of Structural Chemistry, Fujian Institute of Research on the Structure of Matter, CAS, China, 350002. Email: meijin\_lin@fzu.edu.cn, cchuang@fzu.edu.cn, Tel: 0086 591 2286 6143

### Table of Contents:

|                                              |    |
|----------------------------------------------|----|
| 1. Experimental details and synthesis        | S2 |
| 2. Single Crystal X-ray Diffraction Analyses | S3 |
| 3. XPS spectra                               | S5 |
| 4. Thermogravimetric analyses                | S6 |
| 5. X-ray Powder Diffraction                  | S6 |
| 6. Photograph                                | S7 |
| 7. References                                | S7 |

## 1. Experimental Details and Synthesis

**Materials and Methods:** *N*-methylpyrrolidin-2-one (NMP, analytical reagent grade),  $\text{H}_3\text{PMo}_{12}\text{O}_{40}$ ,  $\text{ZnSiF}_6 \cdot 6\text{H}_2\text{O}$ , ethanol (analytical reagent grade) and methanol (analytical reagent grade) were obtained from commercial suppliers. All chemicals and reagents were used as received unless otherwise stated. NMR spectra were recorded with a Bruker Avance III 500 MHz NMR spectrometer. Chemical shifts are given in parts per million (ppm) and referred to TMS as internal standard.  $^1\text{H}$  coupling constants  $J$  are given in Hertz (Hz). ESI mass spectra were recorded on a LCQ Fleet from Thermo Fisher Scientific. IR spectra were recorded in the range  $4000\text{--}400\text{ cm}^{-1}$  on a Perkin-Elmer FT-IR spectrum 2000 spectrometer with pressed KBr pellets. The electron spin resonance (ESR) measurements were recorded on a Bruker A300 instrument operating in the X-band at room temperature. The XPS studies were performed with a Thermo Fisher ESCALAB250 X-ray photoelectron spectrometer (powered at 150 W) using Al  $K\alpha$  radiation ( $\lambda = 8.357\text{ \AA}$ ). To compensate for surface charging effects, all XPS spectra were referenced to the C 1s neutral carbon peak at 284.7 eV. Powder X-ray diffraction (PXRD) patterns were recorded with a Rigaku MiniFlex-II X-Ray diffractometer with Cu  $K\alpha$  radiation ( $\lambda = 1.54178\text{ \AA}$ ). TGA measurements were performed on a TG-209 system with a heating rate of  $10\text{ }^\circ\text{C/min}$  under an  $\text{N}_2$ -atmosphere. UV-Vis diffuse reflectance spectra were recorded at room temperature on a Varian Cary 500 UV-Vis spectrophotometer equipped with an integrating sphere.

The organic ligand *N, N'*-di(4-pyridyl)-1,4,5,8-naphthalene diimide (DPNDI) was synthesized following the reported process.<sup>[S1]</sup>

**Synthesis of compound 1.** A solution (0.5 mL) of NMP/EtOH (1:1, v/v) was carefully layered over a NMP (5 mL) solution of NDI (0.1mmol, 0.042g) and  $\text{H}_3\text{PMo}_{12}\text{O}_{40}$  (0.025mmol, 0.046g), and then the solution of  $\text{ZnSiF}_6 \cdot 6\text{H}_2\text{O}$  (0.2mmol, 0.041g) in EtOH (5 mL) was carefully added as a second layer. Yellow crystals of compound **1** were obtained after several days in the dark (*ca.* 30% yield based on polyoxometalates). IR(KBr,  $\text{cm}^{-1}$ ): 3543 (w) 3062(w), 2947(w), 1709(m), 1645(s), 1536(m), 1351(m), 1253(m), 1079(s), 984(m), 818(s), 753(m), 517(w).

## 2. Crystallographic data collection and refinement

Suitable single crystal of compound **1** was mounted on glass fiber for the X-ray measurement. Diffraction data were collected on a Rigaku-AFC7 equipped with a Rigaku Saturn CCD area-detector system. The measurement was made by using graphic monochromatic Mo K $\alpha$  radiation ( $\lambda$ = 0.71073 Å) at 113 K under a cold nitrogen stream. The frame data were integrated and absorption correction using a Rigaku *CrystalClear* program package. All calculations were performed with the *SHELXTL-97* program package [S2], and structures were solved by direct methods and refined by full-matrix least-squares against F<sup>2</sup>. All non-hydrogen atoms were refined anisotropically, and hydrogen atoms of the organic ligands were generated theoretically onto the specific atoms. The diffraction data were treated by the “SQUEEZE” method as implemented in PLATON[S3] to remove diffuse electron density associated with these badly disordered solvent molecules. Crystallographic data have been deposited with the Cambridge Crystallographic Data Center with reference number CCDC 1020295. These data can be obtained free of charge from The Cambridge Crystallographic Data Centre via [www.ccdc.cam.ac.uk/data\\_request/cif](http://www.ccdc.cam.ac.uk/data_request/cif).

**Table S1.** Crystal Data and Structure Refinements for **1**.

|                                                                                                                             |                                                                                                    |
|-----------------------------------------------------------------------------------------------------------------------------|----------------------------------------------------------------------------------------------------|
| Complexes                                                                                                                   | <b>1</b>                                                                                           |
| Crystal size (mm)                                                                                                           | 0.35×0.23×0.20                                                                                     |
| Empirical Formula                                                                                                           | C <sub>68</sub> H <sub>60</sub> FMo <sub>12</sub> N <sub>12</sub> O <sub>54</sub> PZn <sub>2</sub> |
| Formula weight                                                                                                              | 3241.27                                                                                            |
| Crystal system                                                                                                              | Monoclinic                                                                                         |
| Space group                                                                                                                 | <i>P2/c</i>                                                                                        |
| <i>a</i> (Å)                                                                                                                | 19.693(4)                                                                                          |
| <i>b</i> (Å)                                                                                                                | 16.245(3)                                                                                          |
| <i>c</i> (Å)                                                                                                                | 26.761(8)                                                                                          |
| $\alpha$ (°)                                                                                                                | 90                                                                                                 |
| $\beta$ (°)                                                                                                                 | 132.800(18)                                                                                        |
| $\gamma$ (°)                                                                                                                | 90                                                                                                 |
| <i>V</i> (Å <sup>3</sup> )                                                                                                  | 6282(3)                                                                                            |
| <i>Z</i>                                                                                                                    | 2                                                                                                  |
| <i>D<sub>c</sub></i> (g/ cm <sup>3</sup> )                                                                                  | 1.714                                                                                              |
| $\mu$ (Mo K $\alpha$ ) (mm <sup>-1</sup> )                                                                                  | 1.624                                                                                              |
| <i>F</i> (000)                                                                                                              | 3144                                                                                               |
| Collected reflections                                                                                                       | 52158                                                                                              |
| Independent reflections                                                                                                     | 14511 (0.0795)                                                                                     |
| Goodness-of-fit on <i>F</i> <sup>2</sup>                                                                                    | 1.094                                                                                              |
| <i>R</i> <sub>1</sub> <sup><i>a</i></sup> , <i>wR</i> <sub>2</sub> <sup><i>b</i></sup> ( <i>I</i> >2 $\sigma$ ( <i>I</i> )) | 0.0914, 0.2212                                                                                     |
| <i>R</i> <sub>1</sub> <sup><i>a</i></sup> , <i>wR</i> <sub>2</sub> <sup><i>b</i></sup> (all data )                          | 0.1089, 0.2318                                                                                     |

### 3. XPS spectra

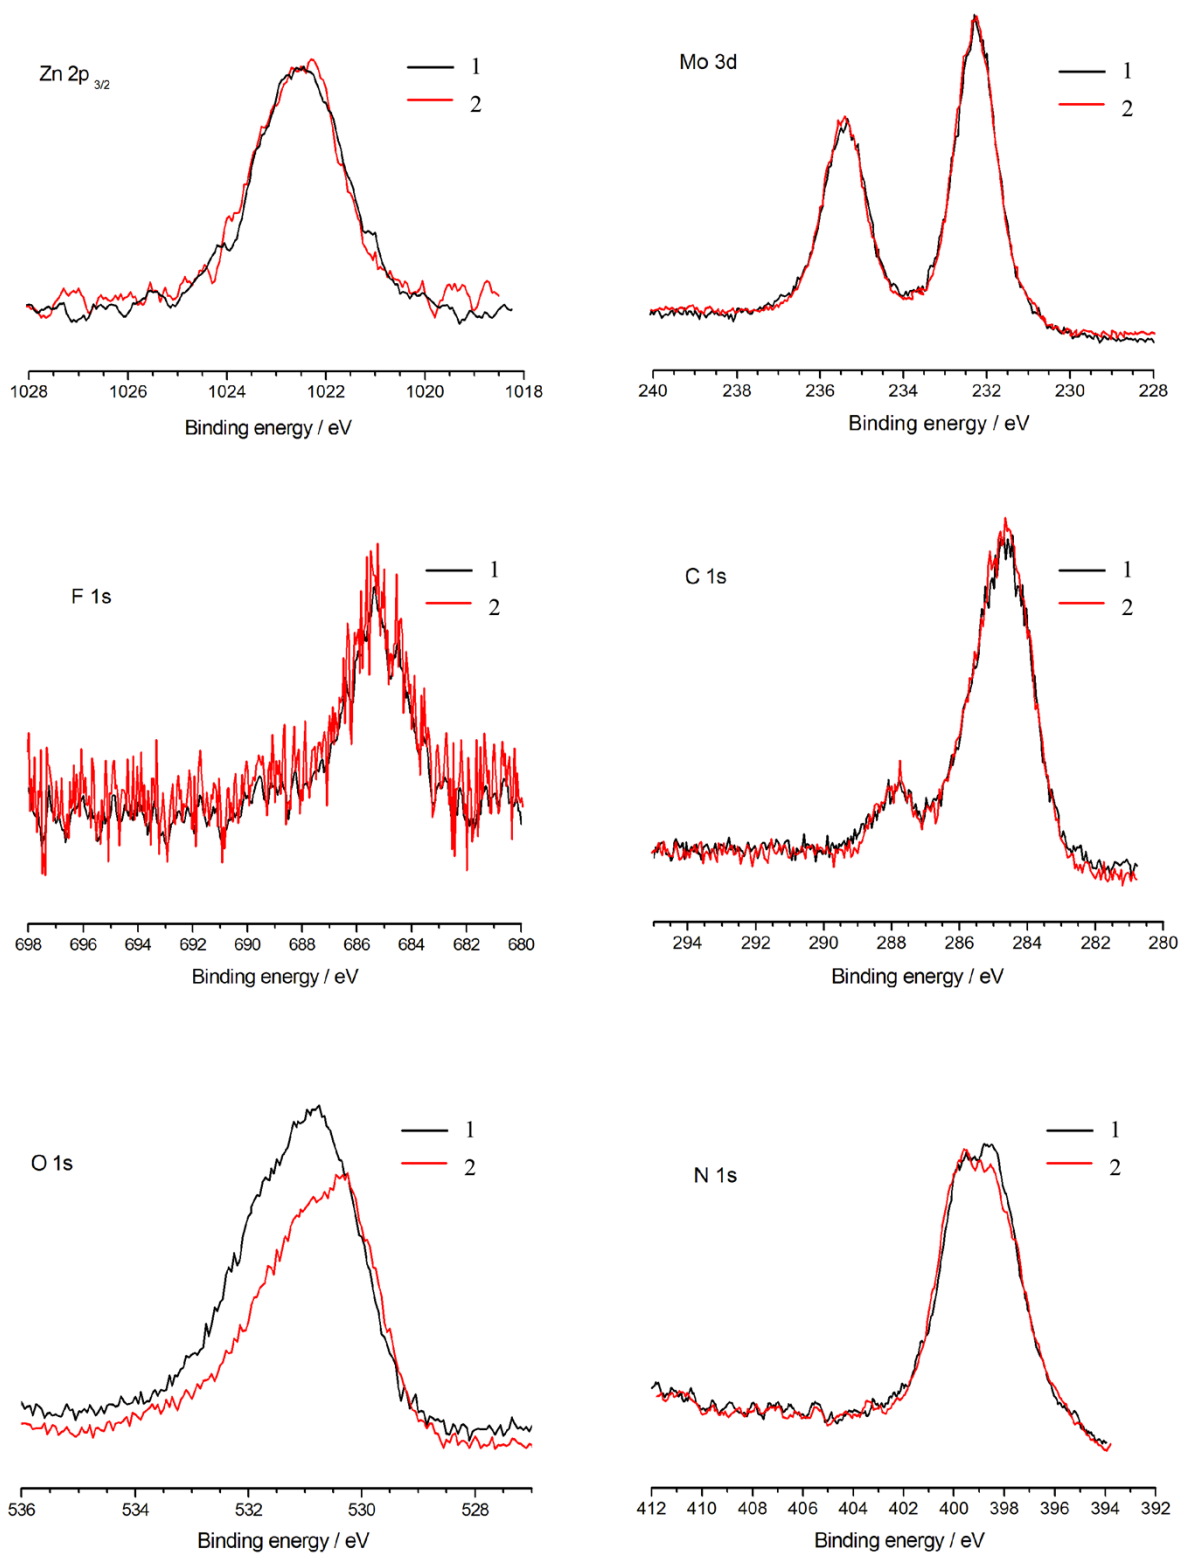

**Figure S1.** XPS core-level spectra of **1** and **2**.

#### **4. Thermogravimetric analyses**

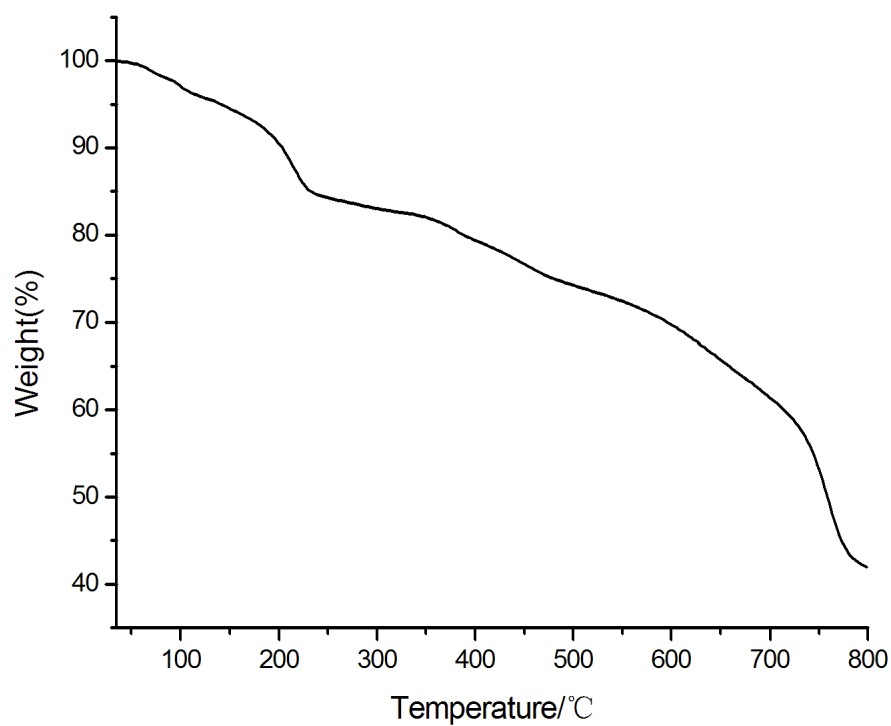

**Figure S2.** TGA data of the **1**.

## 5. X-ray Powder Diffraction

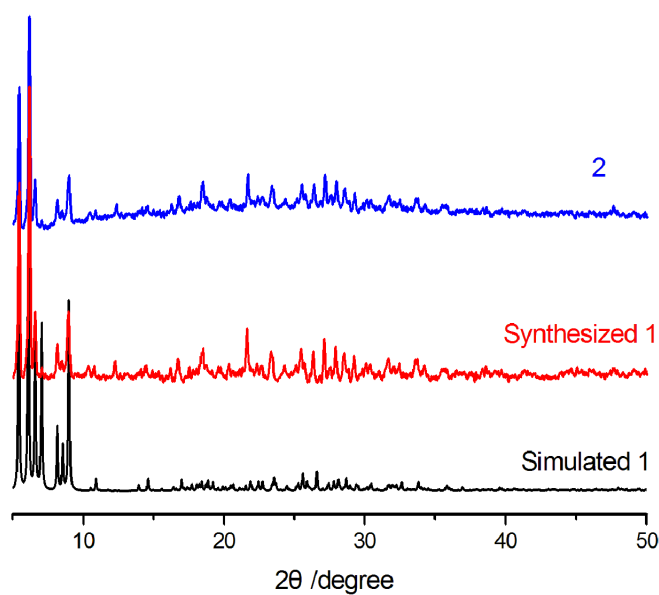

**Figure S3.** PXRD patterns of **1** and **2**.

## 6. Photograph

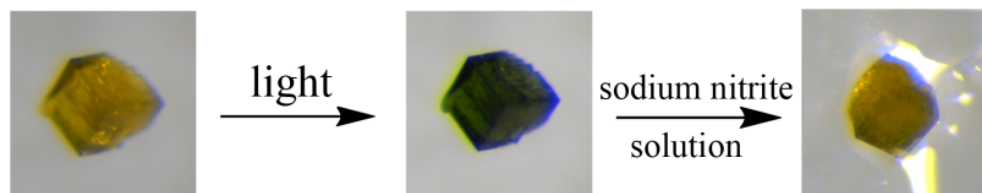

**Figure S4.** The coloration and decoloration process of **1** from photographic images

## 7. References

- S1. S. Guha, F. S. Goodson, L. J. Corson and S. Saha. *J. Am. Chem. Soc.*, 2012, **134**, 13679.  
S2. G. Sheldrick. *Acta Cryst.* 2008, **A64**, 112-122.  
S3. Spek, *Acta Crystallogr.*, 2009, **D65**, 148-155.
